# Supplementary material for: Effective hydrogen isotope separation by a robust flexible calix[4]resorcinarene-based porous organic cage
Source: Royal Society of Chemistry journal article supplement (doi:10.1039/d5dt02805a), 2026-01-01
Supplement: d5dt02805a1.pdf [file d5dt02805a1.pdf]

## Supporting Information

### Effective hydrogen isotope separation by a robust flexible calix[4]resorcinarene-based porous organic cage

Yanan Guo,<sup>a,b</sup> Jiajun Feng,<sup>a,b</sup> Wenjing Wang,<sup>b,c</sup> Kongzhao Su<sup>\*b,c</sup> and Daqiang

Yuan<sup>\*b,c</sup>

<sup>a</sup> College of Chemistry, Fuzhou University, Fuzhou, 350116, People's Republic of China

<sup>b</sup> State Key Lab of Structure Chemistry, Fujian Institute of Research on the Structure of Matter, Chinese Academy of Sciences, Fuzhou, 350002, People's Republic of China

<sup>c</sup> University of the Chinese Academy of Sciences, Beijing, 100049, People's Republic of China.

E-mail: skz@fjirsm.ac.cn; ydq@fjirsm.ac.cn

## 29 **Section S1. General Materials and Measurements**

30 All the reagents were purchased from the market and no further purification was  
31 necessary, while the ligand CR4ACHO (tetraformylcalix[4]resorcinarene) was  
32 synthesized using the method described in the literature procedure.<sup>S1</sup> <sup>1</sup>H NMR spectra  
33 were recorded on a Bruker Avance 400 spectrometer operating at 400 MHz. Fourier  
34 transform infrared (FT-IR) spectra were recorded on a Vertex 750 spectrometer using  
35 the KBr pellet method, covering a wavenumber range from 4000 to 500 cm<sup>-1</sup>. TGA  
36 measurements were carried out on a STA 449F3 analyzer with approximately 5-10  
37 mg of sample in an alumina crucible, under a nitrogen atmosphere, at a heating rate of  
38 10 °C/min from room temperature to 800 °C. The morphology was observed with a  
39 SU8010 scanning electron microscope (SEM). MALDI-TOF mass spectra were  
40 acquired on a Bruker ultrafleXtreme spectrometer. Powder X-ray diffraction (PXRD)  
41 patterns were recorded on a Rigaku Mini 600 diffractometer using Cu K $\alpha$  radiation ( $\lambda$   
42 = 1.54 Å). PXRD simulations were conducted utilizing the Mercury software package  
43 (employing the single crystal data and diffraction crystal module), which is available  
44 free of charge at <http://www.ccdc.cam.ac.uk/products/mercury/>.

## 45 **Adsorption/desorption experiments**

46 The N<sub>2</sub>, H<sub>2</sub> and D<sub>2</sub> adsorption-desorption isotherms of the adsorbent were measured  
47 using a BSD Series 660M-0162 (High-Performance) Gas Sorption Analyzer at 77 K  
48 and 87 K, respectively. Prior to gas adsorption measurements, CPOC-F301, CPOC-  
49 301, and SMS-POC-1 were subjected to solvent exchange every 24 hours over a five-  
50 day period. Approximately 100 mg of the solvent-exchanged samples was thermally  
51 activated at 373 K for 12 h. Nitrogen (N<sub>2</sub>) physisorption isotherms were acquired at  
52 77 K using a Micromeritics ASAP 2020 Plus surface area and porosity analyzer.  
53 Temperature control during H<sub>2</sub>/D<sub>2</sub> adsorption was achieved using liquid nitrogen (for  
54 77 K) and liquid argon (for 87 K) as cooling media. Pore size distribution analysis  
55 was derived from the N<sub>2</sub> adsorption isotherm at liquid nitrogen temperature by  
56 applying the DFT model (cylindrical pore geometry assumed) embedded in the  
57 Micromeritics ASAP 2020 software. The material underwent an activation

58 pretreatment by being degassed at 373 K for 12 hours before the gas adsorption  
59 measurements, ensuring a clean surface for accurate analysis.

## 60 Breakthrough Measurements

61 Dynamic gas breakthrough experiments were performed using a BSD-MAB  
62 dynamic gas breakthrough system. Specifically, three samples (CPOC-F301, CPOC-  
63 301, and SMS-POC-1) were individually packed into 1 mL quartz column, with a  
64 small amount of quartz wool filled at both ends of each column to secure the samples.  
65 Prior to breakthrough testing, the samples were activated at 373 K for 12 h under a  
66 continuous neon (Ne) flow of 8 mL/min. The breakthrough column was left in a  
67 cooling medium-filled Dewar flask for ~20 min to equilibrate, followed by the  
68 breakthrough test. Dynamic breakthrough experiments were conducted using a  
69 H<sub>2</sub>/D<sub>2</sub>/Ne (3/3/94, vol%) gas mixture at a flow rate of 8 mL/min, with the flow rate  
70 controlled by a precision mass flow controller. The sample was regenerated by  
71 purging with neon gas at a flow rate of 8 mL/min at 100 °C for 120 min, in  
72 preparation for the cycling tests.

73 The complete breakthrough of D<sub>2</sub> was identified when the composition of the  
74 downstream effluent matched that of the feed gas. The adsorption capacity was then  
75 calculated based on a mass balance, as given by the following equation.

$$76 \quad q_i = \frac{C_i V}{22.4} \times \int_0^t \left(1 - \frac{F}{F_0}\right) dt \quad \text{(Equation 1)}$$

77 Where  $q_i$  refers to the equilibrium adsorption capacity of gas  $i$  (mmol·g<sup>-1</sup>),  $C_i$   
78 represents the feed gas concentration,  $V$  refers to the volumetric feed flow rate  
79 (cm<sup>3</sup>·min<sup>-1</sup>),  $t$  represents the adsorption time (min),  $F$  and  $F_0$ , respectively, refer to the  
80 inlet and outlet gas molar flow rates, and  $m$  represents adsorbent mass of (g). The  
81 separation factor ( $\alpha$ ) of breakthrough experiment can be calculated as follows:

$$82 \quad \alpha = \frac{q_A y_B}{q_B y_A} \quad \text{(Equation 2)}$$

84 In which  $y_i$  is molar fraction of gas  $i$  ( $i=A, B$ ) in gas mixture.

## 85 Isosteric heat of adsorption calculations

86 The data were fitted using a virial-type model incorporating parameters  $a_i$  and  $b_j$   
 87 (**Equation 3**). The isosteric heat of adsorption ( $Q_{st}$ ) was determined from the fitting  
 88 parameters according to **Equation 4**, which was derived from the  $D_2/H_2$  adsorption  
 89 isotherms.

$$\ln(P) = \ln(N) + \frac{1}{T} \sum_{i=0}^m a_i N^i + \sum_{j=0}^n b_j N^j \quad \text{(Equation 3)}$$

$$Q_{st} = -R \sum_{i=0}^m a_i N^i \quad \text{(Equation 4)}$$

## 92 IAST calculations of adsorption selectivity

93 To evaluate the separation capability of the material for  $D_2/H_2$ , pure-component  
 94 isotherms were fitted using the single-site Langmuir-Freundlich equation, and the  
 95 molar loadings in the mixture under specified bulk gas-phase partial pressures were  
 96 determined (**Equation 5**). The adsorption selectivity for  $D_2/H_2$  mixtures, based on the  
 97 Ideal Adsorbed Solution Theory (IAST), was calculated using **Equation 6**.

$$N = A_1 \frac{b_1 P^{c1}}{1 + b_1 P^{c1}} \quad \text{(Equation 5)}$$

$$S_{A/B} = \frac{x_A y_B}{x_B y_A} \quad \text{(Equation 6)}$$

## 102 **Section S2. Single-Crystal X-ray Crystallography**

103 **Single-Crystal X-ray Crystallography:** Single-crystal X-ray diffraction data for  
104 **CPOC-F301** were collected on an XtaLAB Synergy R, HyPix diffractometer  
105 equipped with a PhotonJet R (Cu) X-ray source ( $\lambda = 1.5406 \text{ \AA}$ ). The crystal structure  
106 was solved by direct methods and refined using the SHELXTL-2018 program  
107 package.<sup>S2</sup> All non-hydrogen atoms were refined anisotropically. Hydrogen atoms of  
108 the organic ligands were placed in calculated positions using a riding model and  
109 refined with isotropic displacement parameters. The crystal structure was further  
110 processed using the SQUEEZE routine implemented in the PLATON software  
111 package to account for disordered solvent molecules.<sup>S3, 4</sup> Detailed crystallographic  
112 data and cell parameters for **CPOC-F301** are summarized in Table S1.

113

114

115

116

117

118

119

120

121

122

123

124

125

126

127

128

129

130

131

132 **Table S1.** Crystallographic Data and Structure Refinement for **CPOC-F301**.

133

| <b>CPOC-F301</b>                                                    |                                                                   |
|---------------------------------------------------------------------|-------------------------------------------------------------------|
| <b>Formula</b>                                                      | C <sub>360</sub> H <sub>452</sub> N <sub>24</sub> O <sub>48</sub> |
| <b>M / g mol<sup>-1</sup></b>                                       | 5883.48                                                           |
| <b>T / K</b>                                                        | 100                                                               |
| <b>Crystal system</b>                                               | tetragonal                                                        |
| <b>Space group</b>                                                  | <i>P4/n</i>                                                       |
| <b><i>a</i> / Å</b>                                                 | 32.1810(5)                                                        |
| <b><i>b</i> / Å</b>                                                 | 32.1810(5)                                                        |
| <b><i>c</i> / Å</b>                                                 | 37.8481(12)                                                       |
| <b><i>α</i> (°)</b>                                                 | 90                                                                |
| <b><i>β</i> (°)</b>                                                 | 90                                                                |
| <b><i>γ</i> (°)</b>                                                 | 90                                                                |
| <b><i>V</i> / Å<sup>3</sup></b>                                     | 39196.1(17)                                                       |
| <b><i>Z</i></b>                                                     | 2                                                                 |
| <b><i>μ</i> (mm<sup>-1</sup>)</b>                                   | 0.262                                                             |
| <b>Data measured</b>                                                | 99048                                                             |
| <b>Ind. reflns</b>                                                  | 34253                                                             |
| <b>Parameters</b>                                                   | 946                                                               |
| <b>GOF on <i>F</i><sup>2</sup></b>                                  | 0.962                                                             |
| <b><i>R</i><sub>1</sub><sup>a</sup> [<i>I</i> &gt; σ(<i>I</i>)]</b> | 0.0902                                                            |
| <b><i>wR</i><sub>2</sub><sup>b</sup></b>                            | 0.2777                                                            |
| <b>CCDC number</b>                                                  | 2498812                                                           |

134 <sup>a</sup>*R*<sub>1</sub> = Σ||*F*<sub>o</sub>| - |*F*<sub>c</sub>||/Σ|*F*<sub>o</sub>|. <sup>b</sup>*wR*<sub>2</sub> = {Σ[*w*(*F*<sub>o</sub><sup>2</sup> - *F*<sub>c</sub><sup>2</sup>)<sup>2</sup>]/ Σ[*w*(*F*<sub>o</sub><sup>2</sup>)<sup>2</sup>]}<sup>1/2</sup>

135

### Section S3. Synthetic Procedures and Characterizations

#### Synthesis of CPOC-F301:

C4RACHO (0.1 mmol, 41 mg) and trans-1,4-cyclohexanediamine (0.2 mmol, 12 mg) were dissolved in 6 mL of  $\text{CHCl}_3$  in a 20 mL pressure-resistant vial. The mixture was sealed and stirred overnight at 65 °C. After cooling to room temperature, the solution was equally distributed into 20 mL glass vials. Subsequently, 0.5 mL of  $\text{PhNO}_2$  was added to each vial, and red block-shaped crystals of **CPOC-F301** were obtained by slow vapor diffusion of methanol over one week. The crystals were washed with methanol, yielding 69%.  $^1\text{H}$  NMR (400 MHz,  $\text{CDCl}_3$ , 298 K):  $\delta$  14.60 (s, 1H), 11.19 (s, 1H), 8.66 (s, 1H), 7.24 (s, 1H), 4.53 (t, 1H), 2.07 (d, 1H), 1.96–1.89 (m, 1H), 1.52 (dd, 1H), 1.25 (s, 1H), 0.98 (t, 6H) p.p.m. MALDI-TOF-MS:  $[\text{M}+\text{NH}_4]^+$  calcd. for CPOC-F301 ( $\text{C}_{360}\text{H}_{456}\text{N}_{25}\text{O}_{48}$ ) is 5901.624; found 5901.310.

148

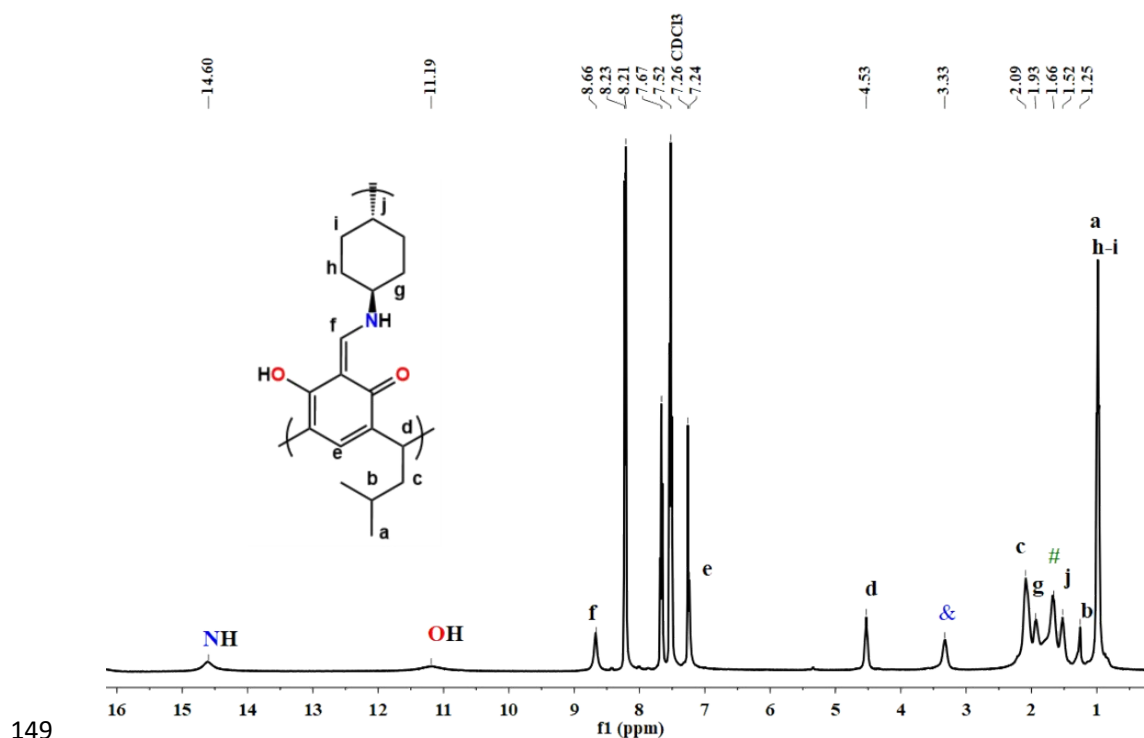

149

150 **Figure S1.**  $^1\text{H}$  NMR spectrum of **CPOC-F301**. (The marked extra peaks, & $\text{CH}_3\text{OH}$ ,  
151 # $\text{H}_2\text{O}$ . The signals in the 7-9 ppm range are assigned to nitrobenzene.)

152

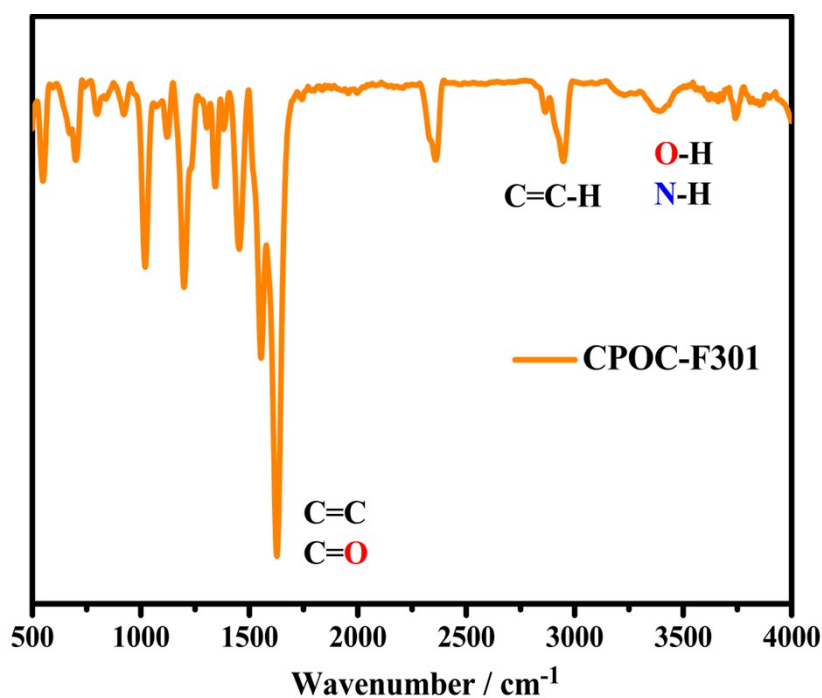

153

154 **Figure S2.** FT-IR spectrum of **CPOC-F301**.

155

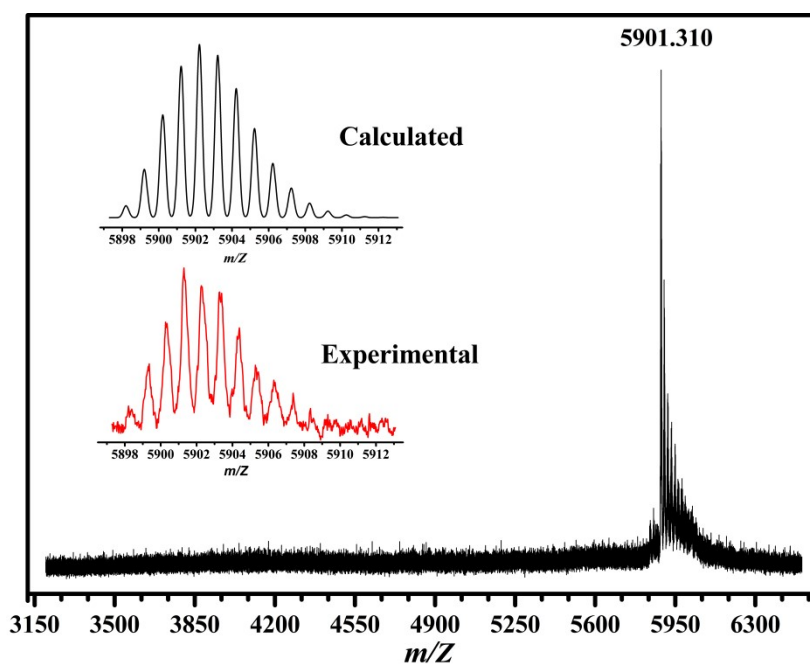

156

157 **Figure S3.** MALDI-TOF-MS mass spectrum of **CPOC-F301** from CDCl<sub>3</sub>.



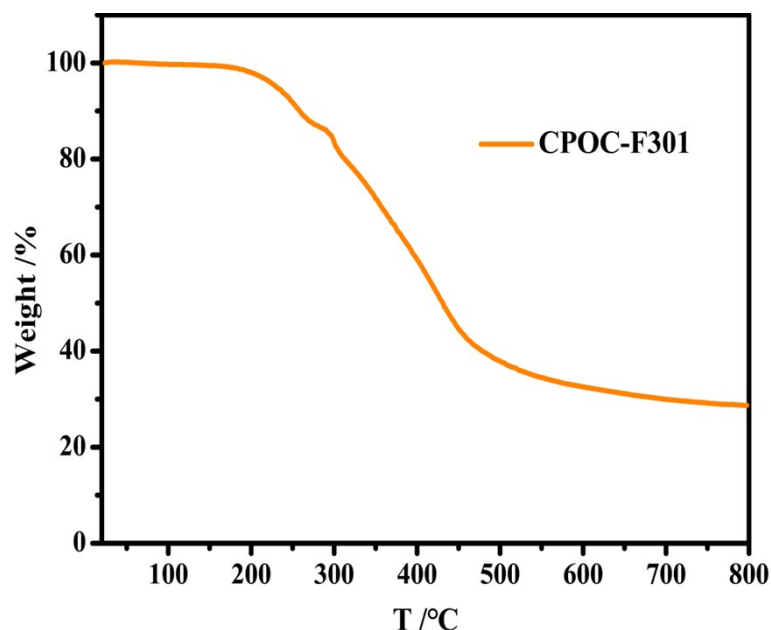

158

159 **Figure S4.** TGA curve of **CPOC-F301**.

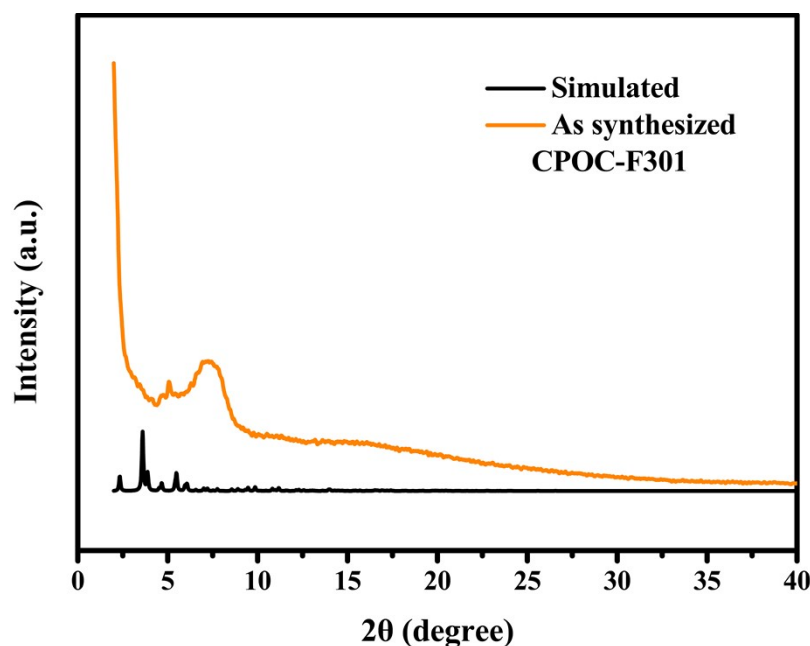

160

161 **Figure S5.** PXRD curves of **CPOC-F301**.

162 **Note:** the PXRD analysis showed that all the experimental powder X-ray  
 163 diffractograms of **CPOC-F301** sample do not keep their original crystallinity  
 164 compared to the powder X-ray diffractograms calculated from their single crystal  
 165 structure data. This might be ascribed to that the packings of the isolated cage  
 166 compounds are assembled by weak supramolecular interactions, which are different  
 167 to MOFs and COFs assembled with much stronger coordination bonds and covalent  
 168 bonds, respectively. These phenomena are often observed in cage system, especially  
 169 for those with large cavities.<sup>S5-7</sup>

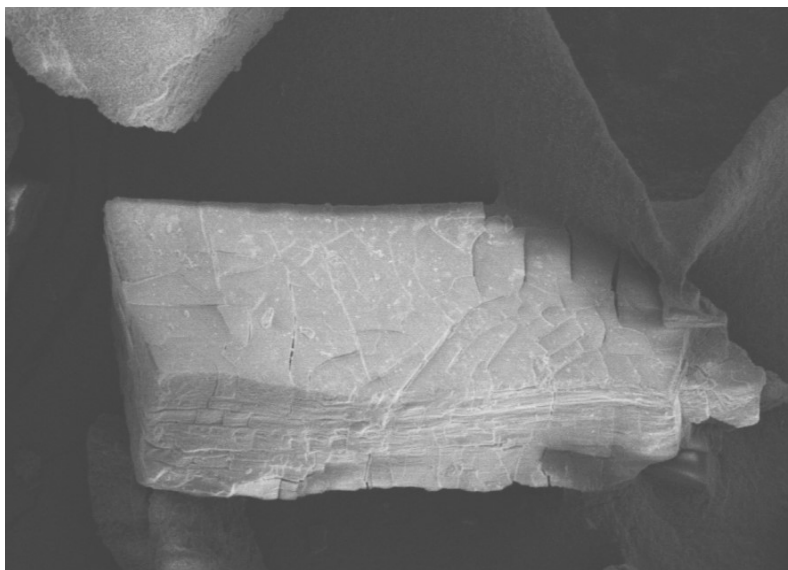

170

171 **Figure S6.** SEM image of CPOC-F301.

172

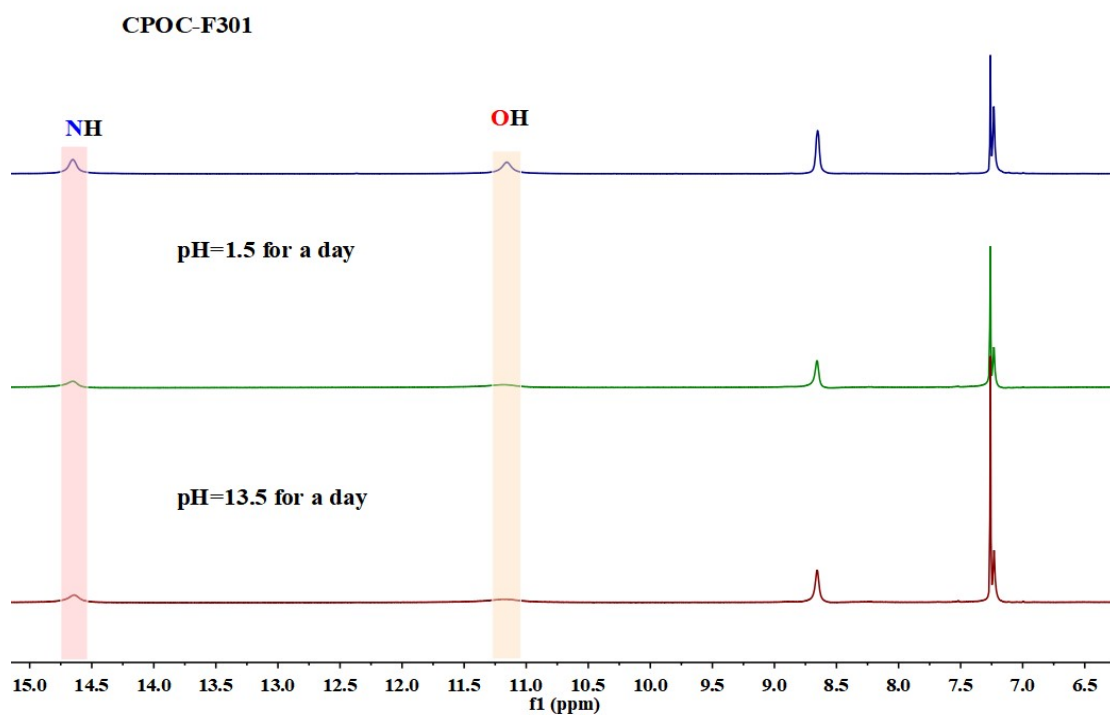

173

174 **Figure S7.** <sup>1</sup>H NMR spectra of CPOC-F301 under various conditions.

175

176

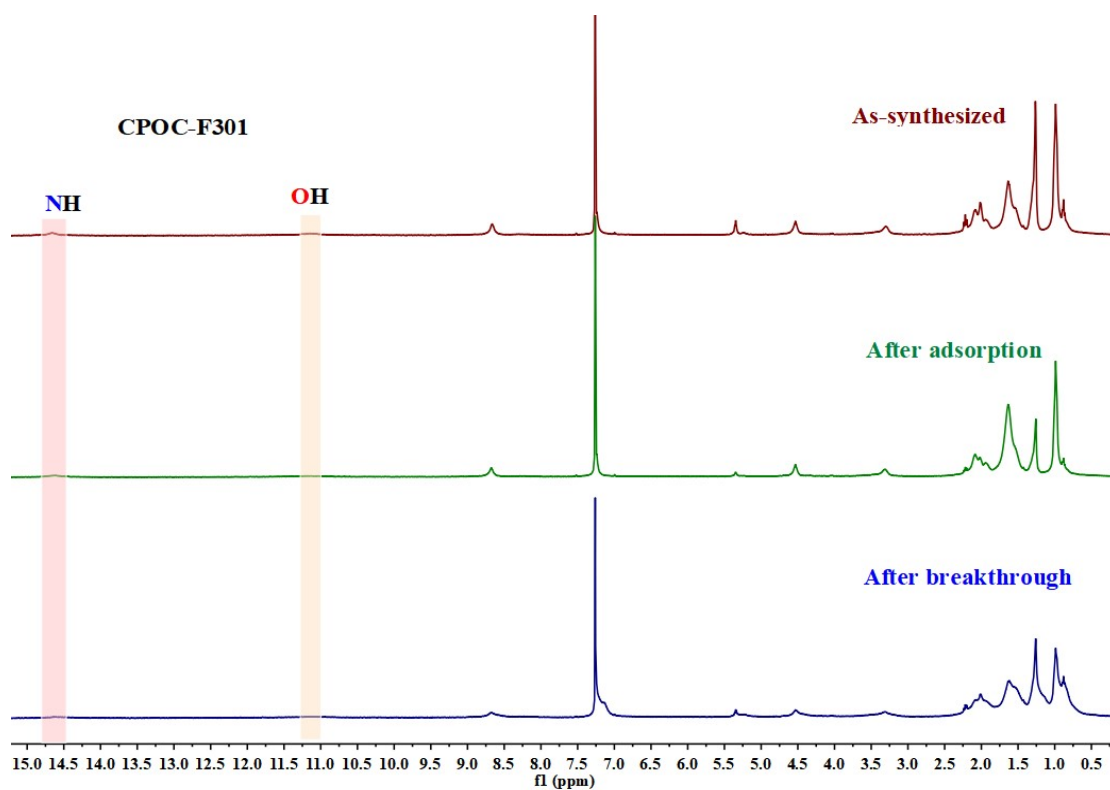

177  
178 **Figure S8.**  $^1\text{H}$  NMR spectra of CPOC-F301 after adsorption and breakthrough tests.  
179

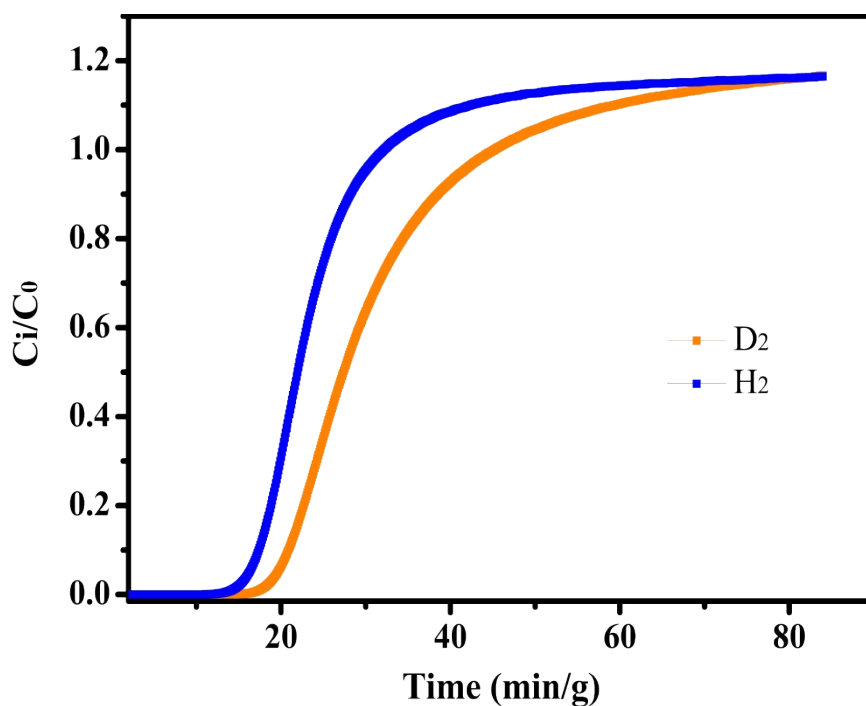

180  
181 **Figure S9.** Dynamic breakthrough curves of CPOC-F301 for  $\text{D}_2/\text{H}_2/\text{Ne}$  mixtures  
182 under 87 K, 3/3/94 (vol%), 8 mL/min.  
183

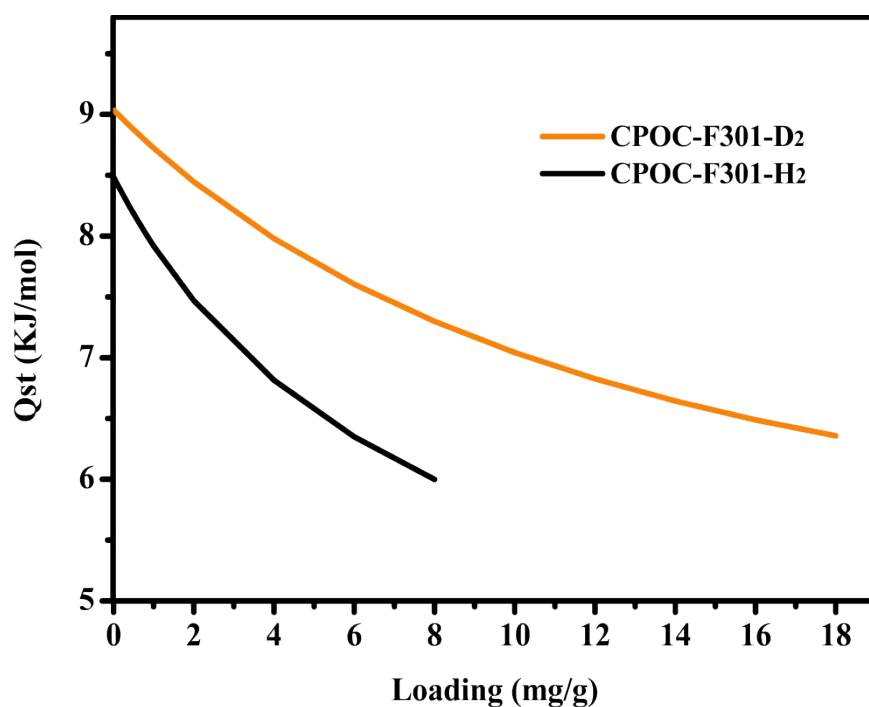

184

185 **Figure S10.** The isosteric heat of D<sub>2</sub> and H<sub>2</sub> for CPOC-F301.

186

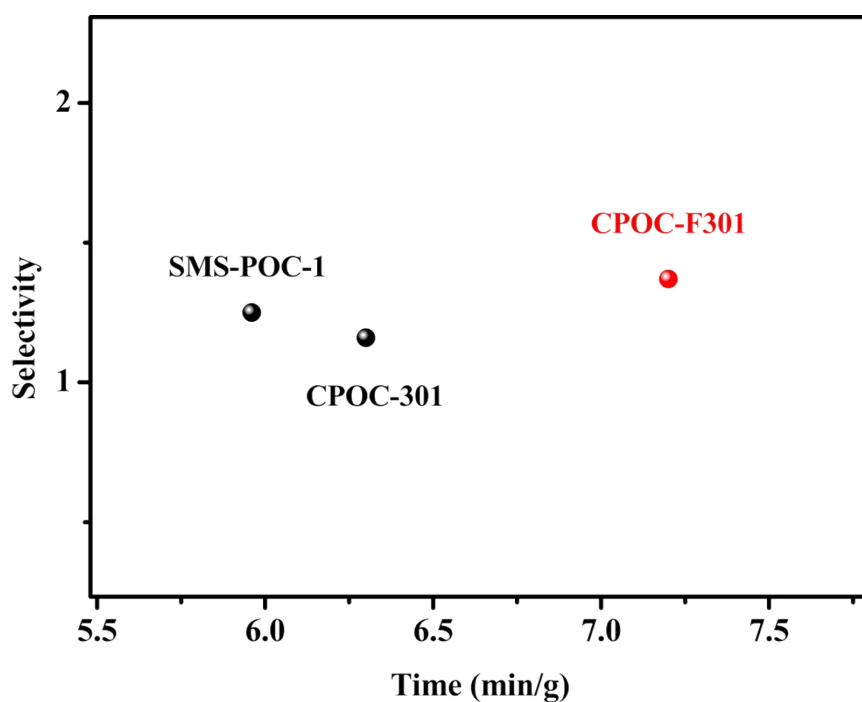

187

188 **Figure S11.** A comparison diagram of the separation data of the three crystals.

189

190

191

192

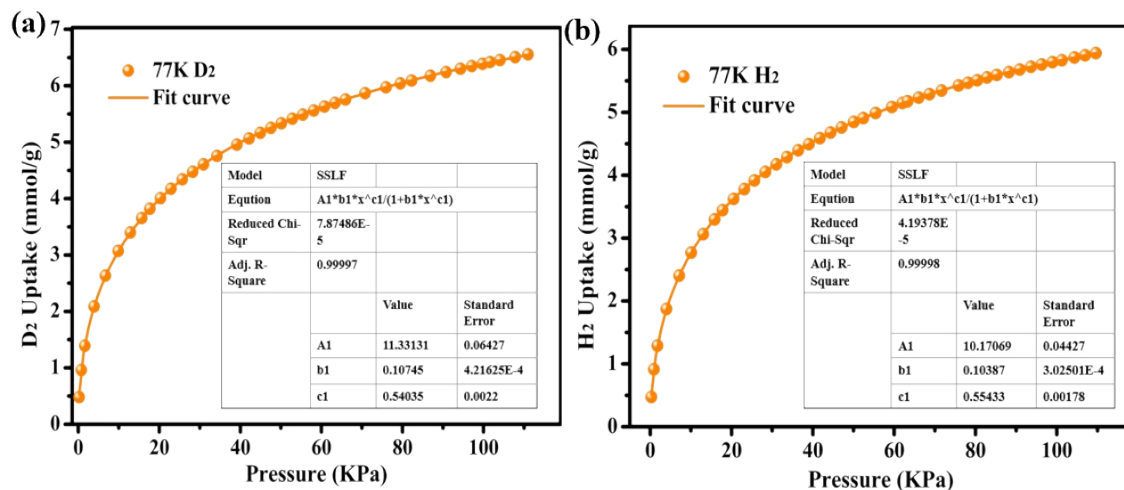

193

194 **Figure S12.** Single-site Langmuir-Freundlich fitting of (a) H<sub>2</sub> and (b) D<sub>2</sub> adsorption  
195 isotherm of **CPOC-F301** at 77 K.

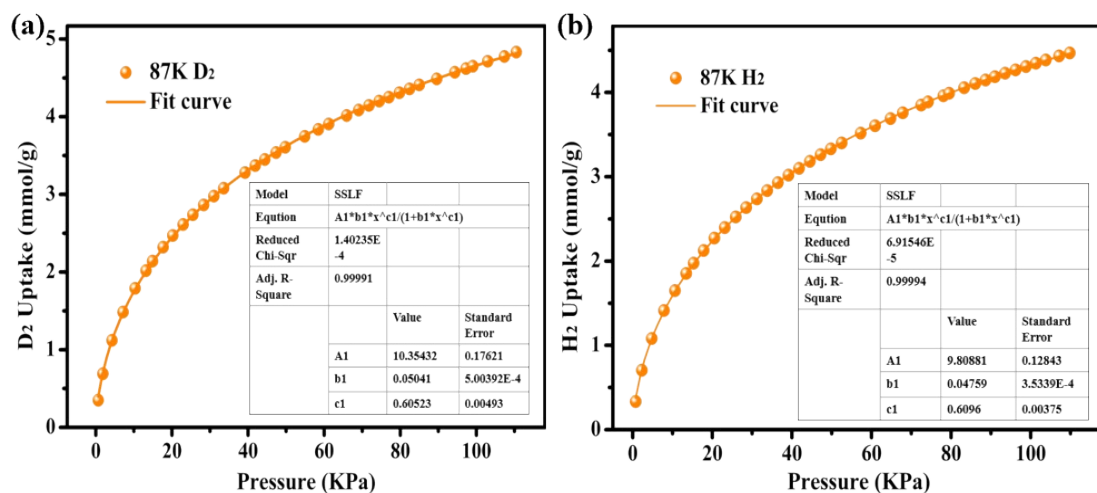

196

197 **Figure S13.** Single-site Langmuir-Freundlich fitting of (a) H<sub>2</sub> and (b) D<sub>2</sub> adsorption  
198 isotherm of **CPOC-F301** at 87 K.

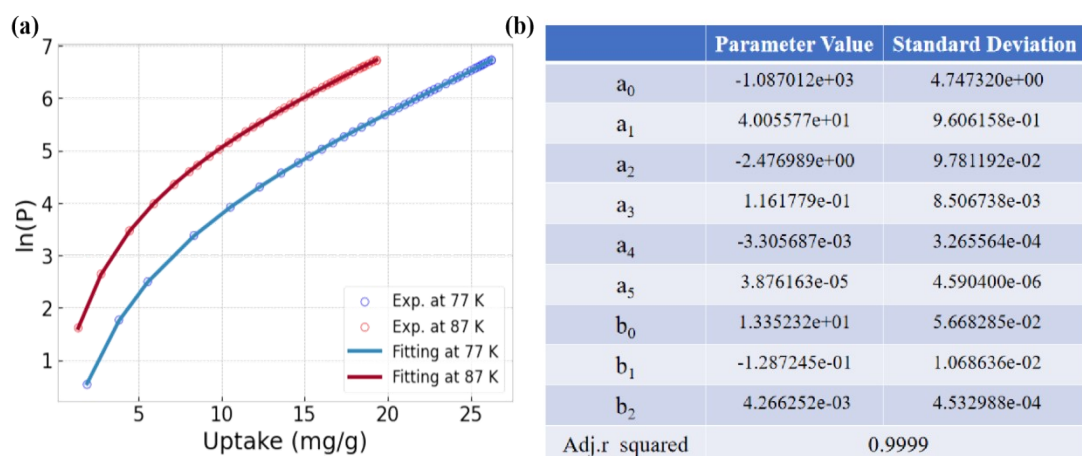

199

200 **Figure S14.** (a) Virial equation fitting of D<sub>2</sub> adsorption isotherm of **CPOC-F301** at

201 77 K and 87 K. (b) Relevant fitting parameters for D<sub>2</sub>.

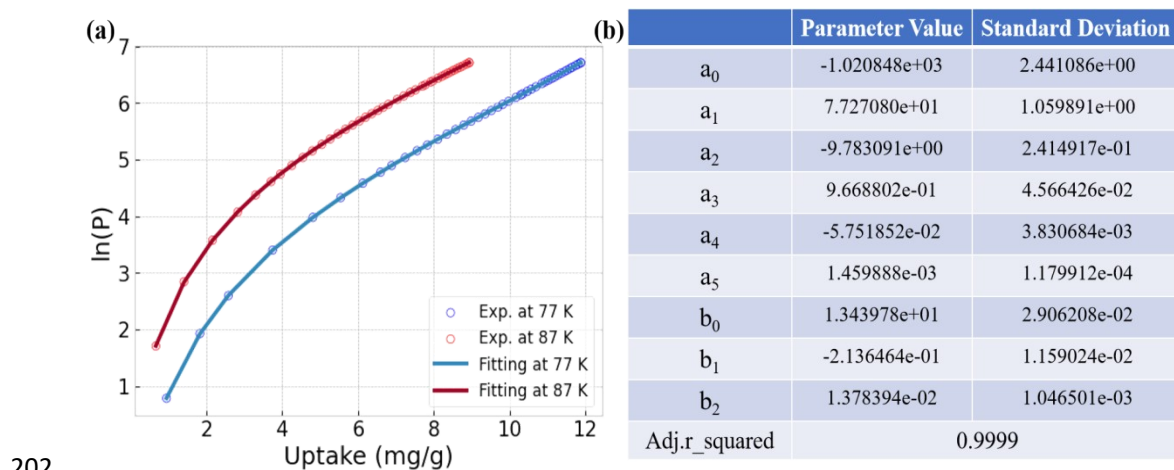

203 **Figure S15.** (a) Virial equation fitting of H<sub>2</sub> adsorption isotherm of CPOC-F301 at

204 77 K and 87 K. (b) Relevant fitting parameters for H<sub>2</sub>.

205

206 **Table S2.** Summary table of hydrogen isotope separation performance for different

207 porous materials at 1 bar and 77 K.

208

| Compound  | D <sub>2</sub><br>(cm <sup>3</sup> /g<br>) | H <sub>2</sub><br>(cm <sup>3</sup> /g) | Qst-D <sub>2</sub><br>(KJ/mol<br>) | Qst-H <sub>2</sub><br>(KJ/mol<br>) | Selectivity | Time<br>(min/g) | Ref.         |
|-----------|--------------------------------------------|----------------------------------------|------------------------------------|------------------------------------|-------------|-----------------|--------------|
| CPOC-F301 | 147                                        | 134                                    | 9.03                               | 8.48                               | 1.37        | 7.2             | This<br>work |
| CPOC-301  | 159                                        | 145                                    | 8.29                               | 8.17                               | 1.25        | 5.96            |              |
| SMS-POC-1 | 163                                        | 151                                    | 7.67                               | 7.40                               | 1.16        | 6.3             |              |
| FJI-Y11   | 205                                        | 183                                    | 7.88                               | 7.13                               | 1.76        | 17              | S8           |
| Zn-MOF-74 | 212.8                                      | 190.4                                  | 9.2                                | 8.3                                | 1.75        | 0               | S9           |
| Mg-MOF-74 | 296                                        | 271                                    | 12.8                               | 11.3                               | 3.24        | 10              |              |
| Ni-MOF-74 | 106                                        | 74                                     | 13.7                               | 12.1                               | 1.44        | 17              |              |
| Cu-BTB    | 138                                        | 121                                    | 10.9                               | 10.5                               | 1.87        | 6.2             | S10          |
| ECUT-8    | 208                                        | 186                                    | 8.4                                | 7.9                                | 1.38        | 4               | S11          |
| FJI-Y9    | 221.9                                      | 202.3                                  | 6.2                                | 6.0                                | 1.3         | --              | S12          |
| FIR-29    | 149.7                                      | 136.8                                  | 6.1                                | 5.8                                | 1.2         | --              |              |

|             |      |      |               |               |      |     |     |
|-------------|------|------|---------------|---------------|------|-----|-----|
| Cu-BTT      | 288  | 266  | 10.5          | 9.5           | 1.76 | 16  | S13 |
| MIL-101(Cr) | 270  | 240  | 12.5          | 12            | 1.4  | 28  | S14 |
| ZJNU-119    | 358  | 325  | 7.6           | 7.2           | 1.37 | 38  | S15 |
| c-1a'       | 88.8 | 80.6 | $\approx 8.8$ | $\approx 8.8$ | 1.6  | 7.5 | S16 |
| Activated 2 | 301  | 278  | 7.45          | 6.85          | 1.53 | 52  | S17 |

209 --means the information was not given.

210

211

212

213 **Section S4. Various characterization data of the control group**  
 214 **materials**

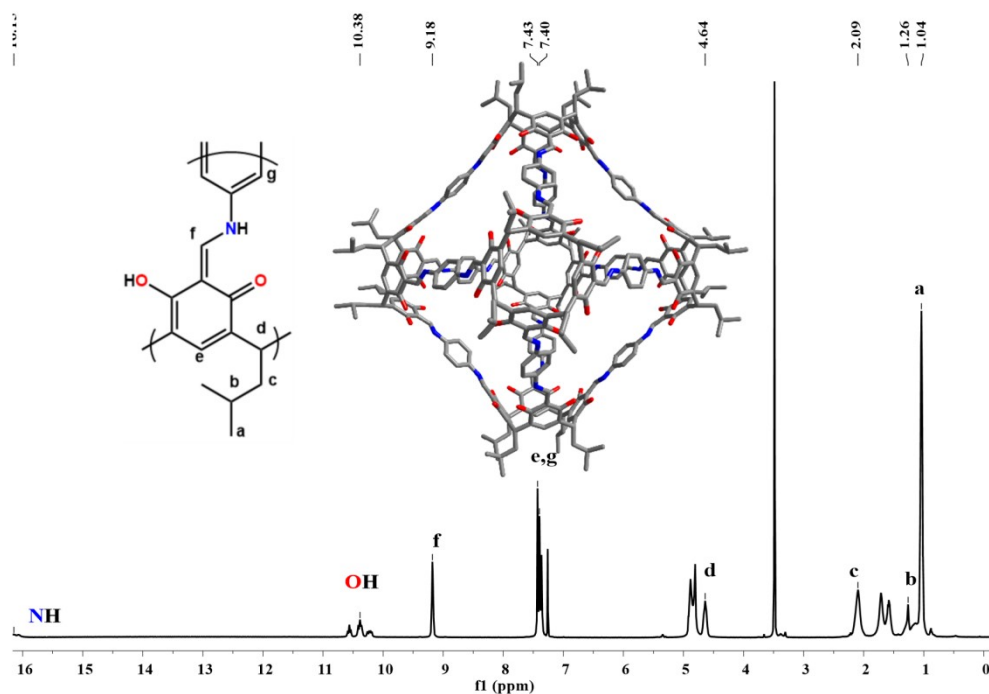

215  
 216 **Figure S16.**  $^1\text{H}$  NMR spectrum of CPOC-301.

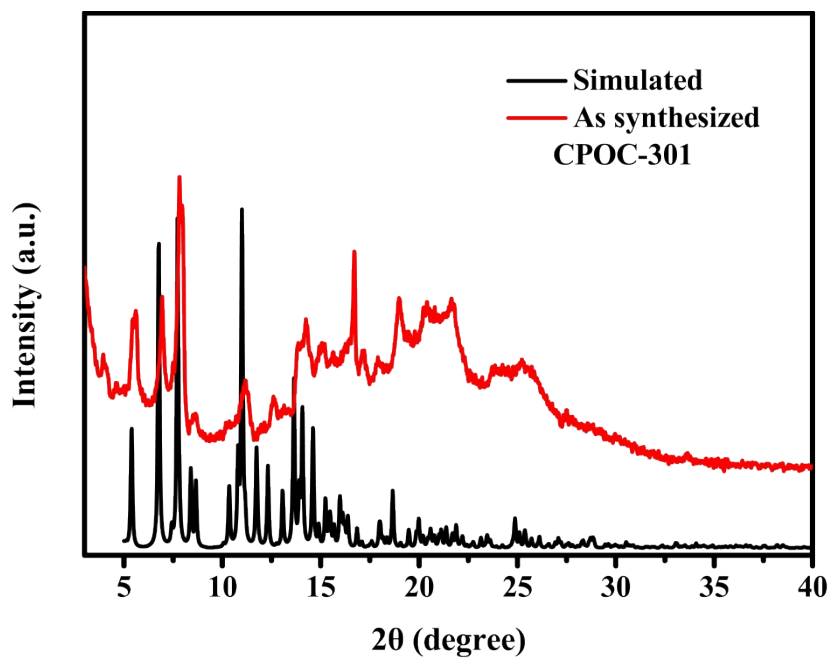

218  
 219 **Figure S17.** PXRD curves of CPOC-301.



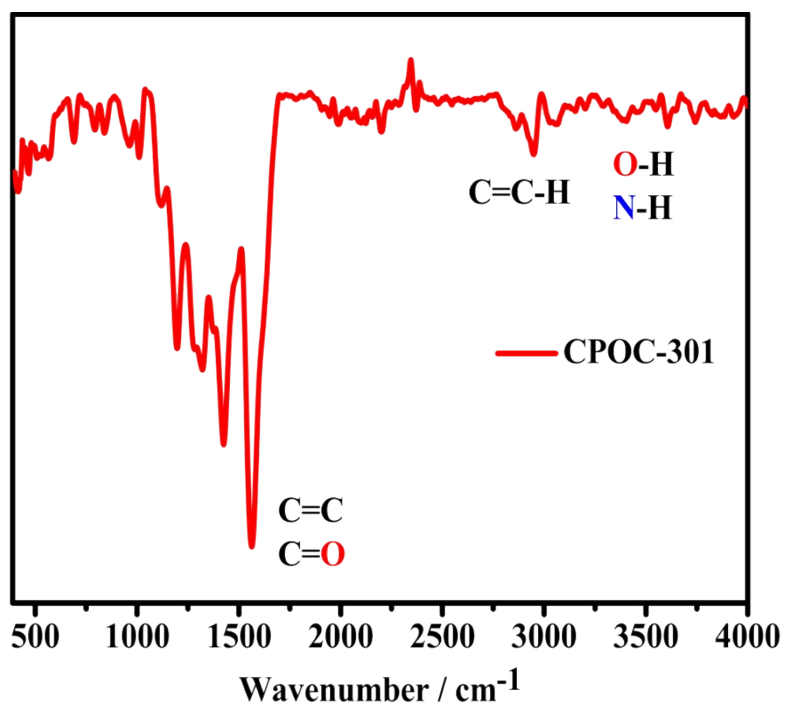

220

221 **Figure S18.** FT-IR spectrum of **CPOC-301**.

222

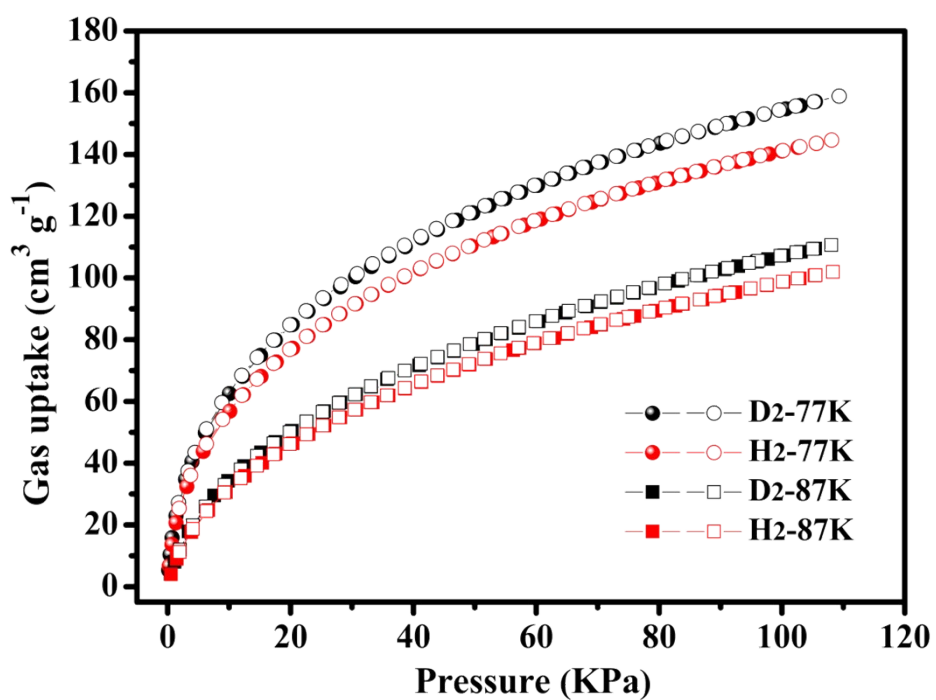

223

224 **Figure S19.** The adsorption isotherms of **CPOC-301** at temperatures of 77 K and 87

225 K.

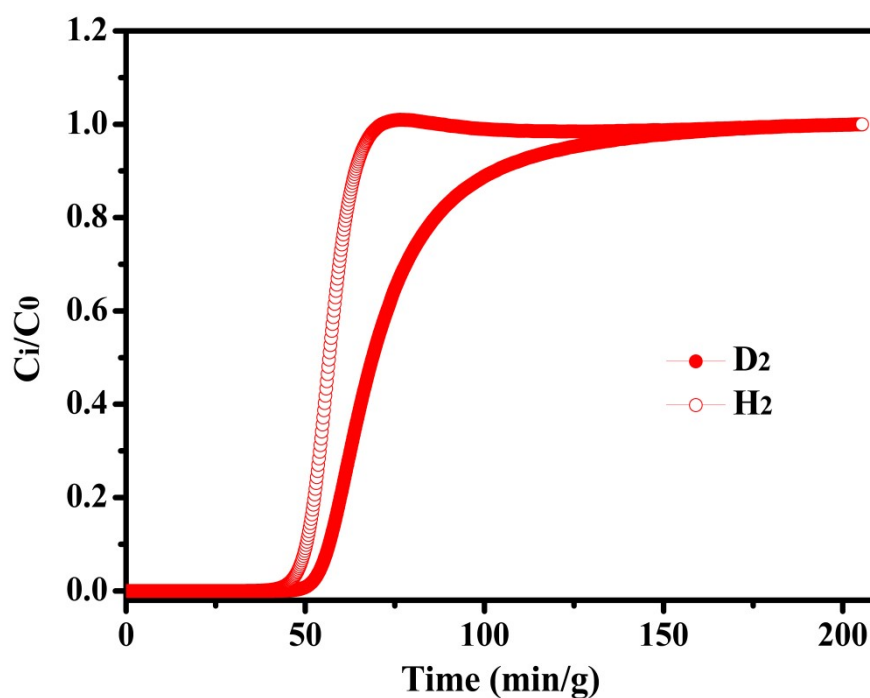

226

227 **Figure S20.** Experimental breakthrough curves of **CPOC-301** for the mixed gases of

228  $D_2/H_2/Ne$  (3/3/94, v/v) at 77 K and 1 bar.

229

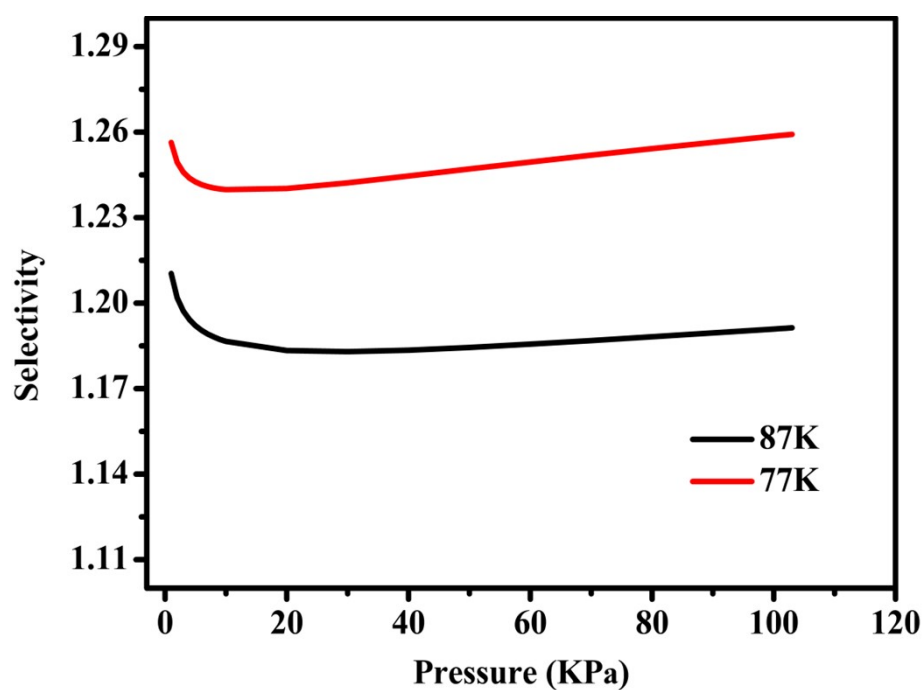

230

231 **Figure S21.** IAST selectivity of **CPOC-301** for equimolar  $D_2/H_2$  mixture at 77 K and

232 87 K.

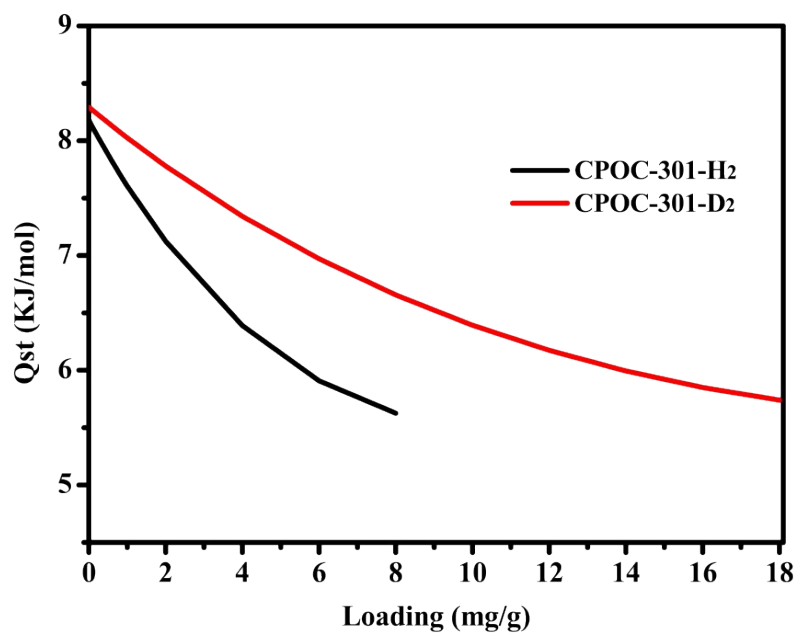

233

234 **Figure S22.** Q<sub>st</sub> values of D<sub>2</sub> and H<sub>2</sub> for CPOC-301.

235

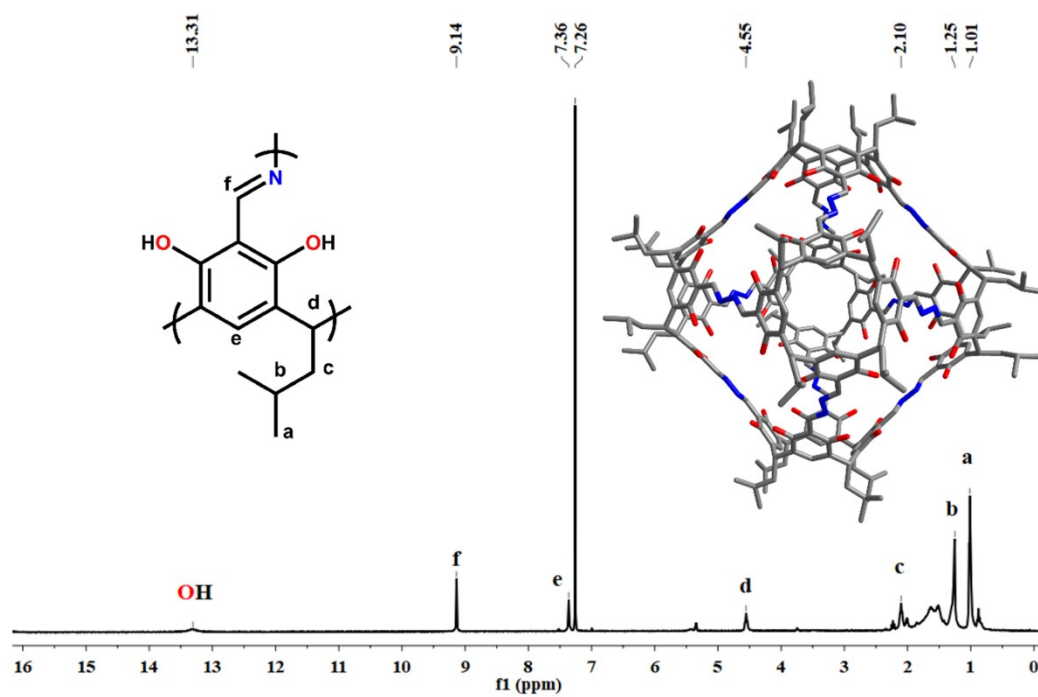

236

237 **Figure S23.** <sup>1</sup>H NMR spectrum of SMS-POC-1.

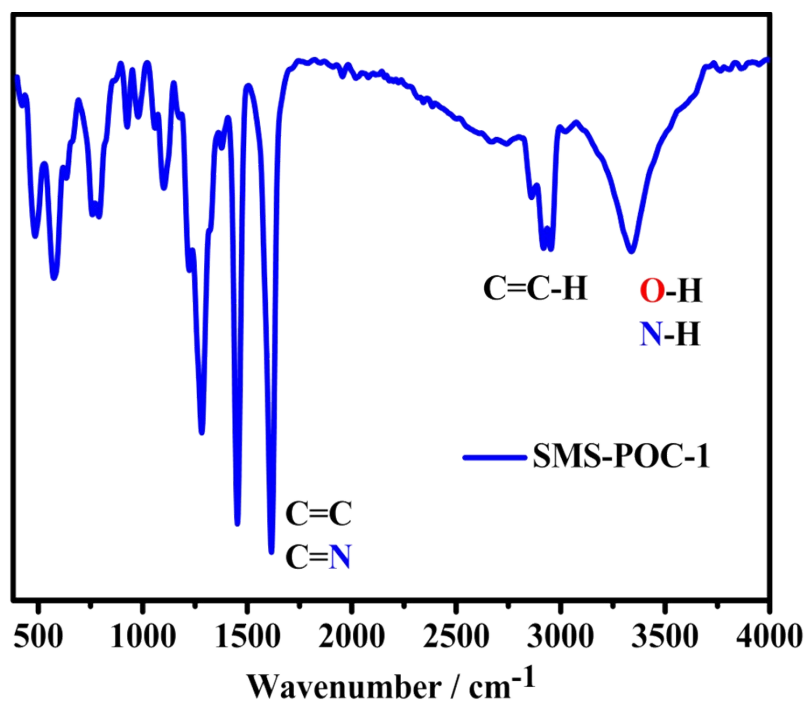

238

239 **Figure S24.** FT-IR spectrum of SMS-POC-1.

240

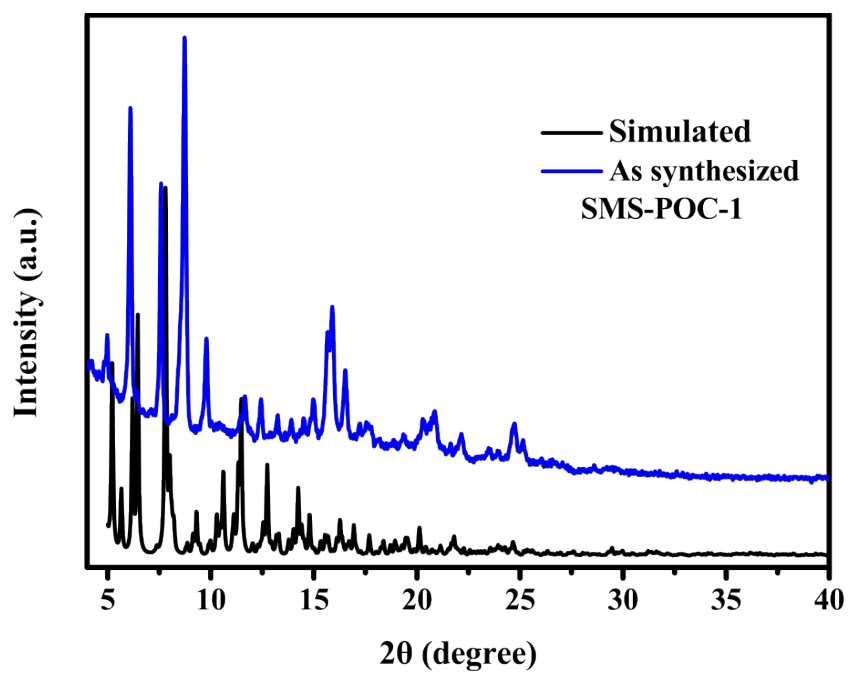

241

242 **Figure S25.** PXRD curves of SMS-POC-1.

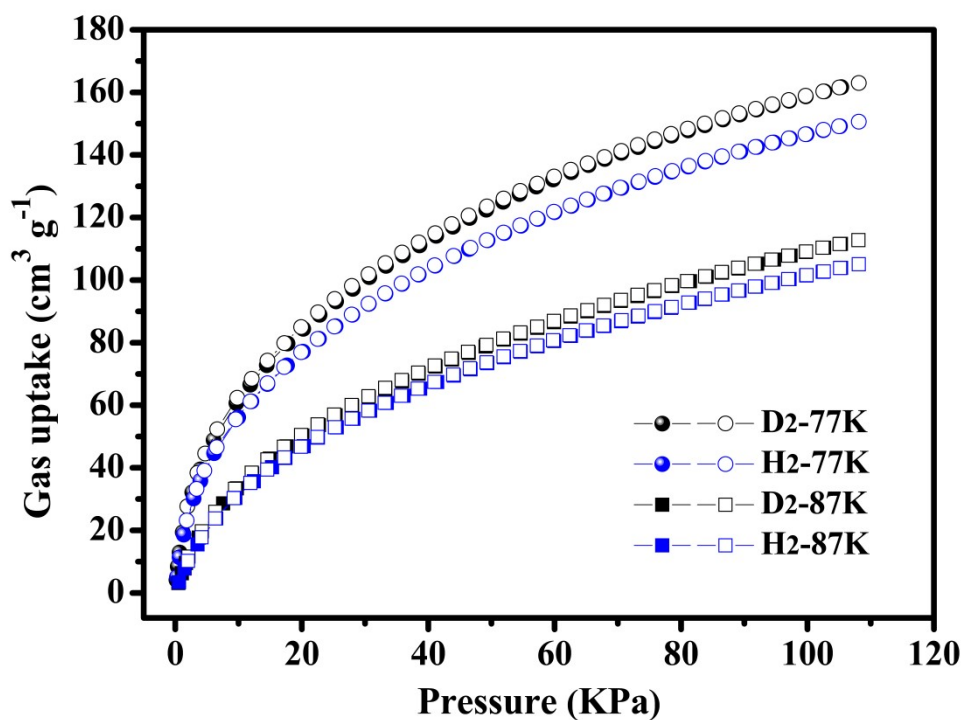

243

244 **Figure S26.** The adsorption isotherms of SMS-POC-1 at temperatures of 77 K and 87  
 245 K.

246

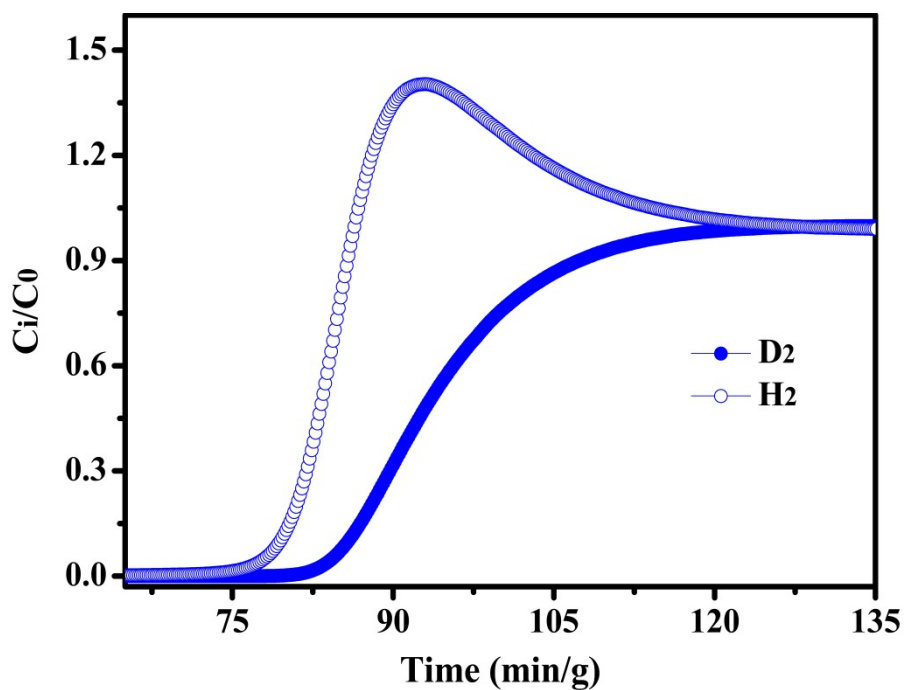

247

248 **Figure S27.** Experimental breakthrough curves of SMS-POC-1 for the mixed gases  
 249 of D<sub>2</sub>/H<sub>2</sub>/Ne (3/3/94, v/v) at 77 K and 1 bar.

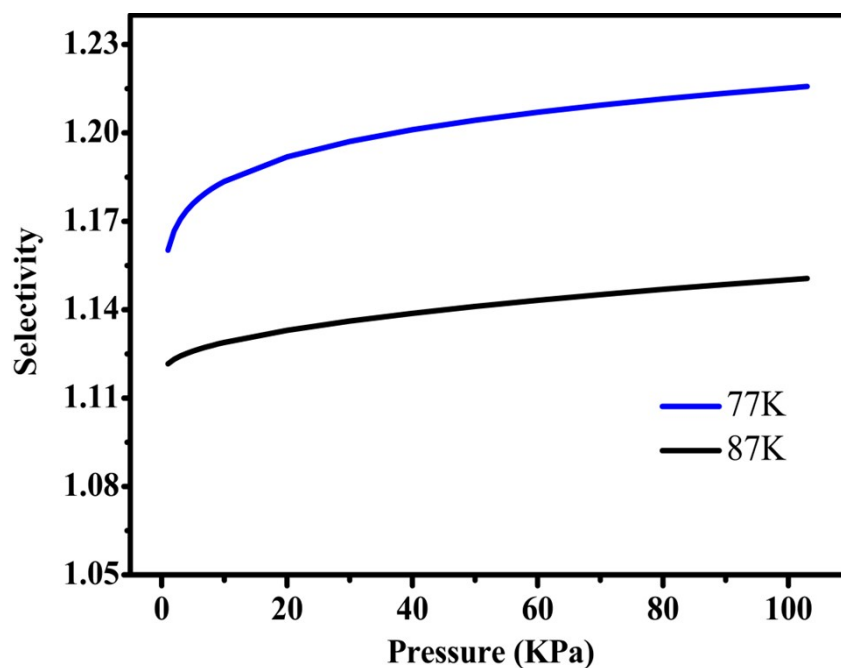

250

251 **Figure S28.** IAST selectivity of SMS-POC-1 for equimolar  $D_2/H_2$  mixture at 77 K

252 and 87 K.

253

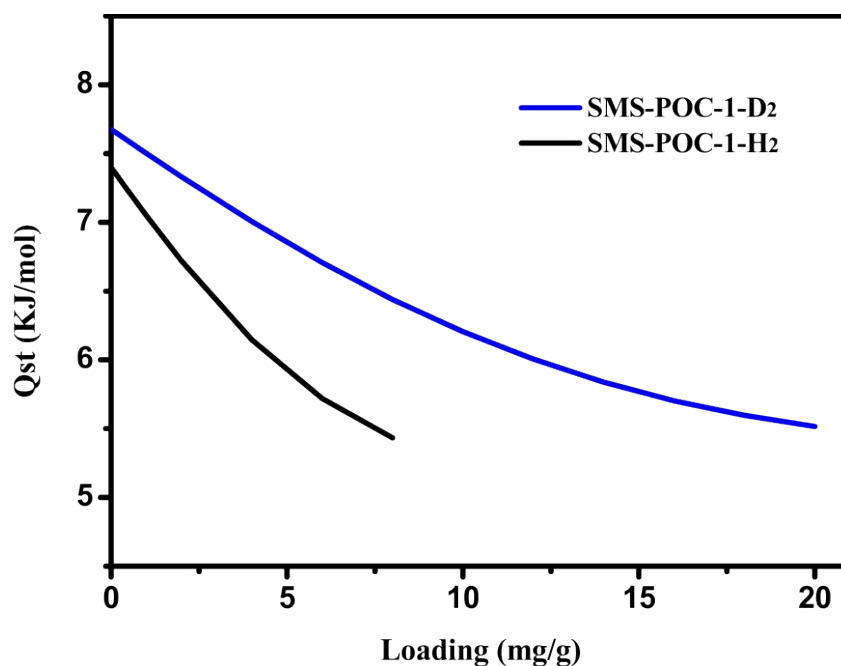

254

255 **Figure S29.** Qst values of  $D_2$  and  $H_2$  for SMS-POC-1.

256

257

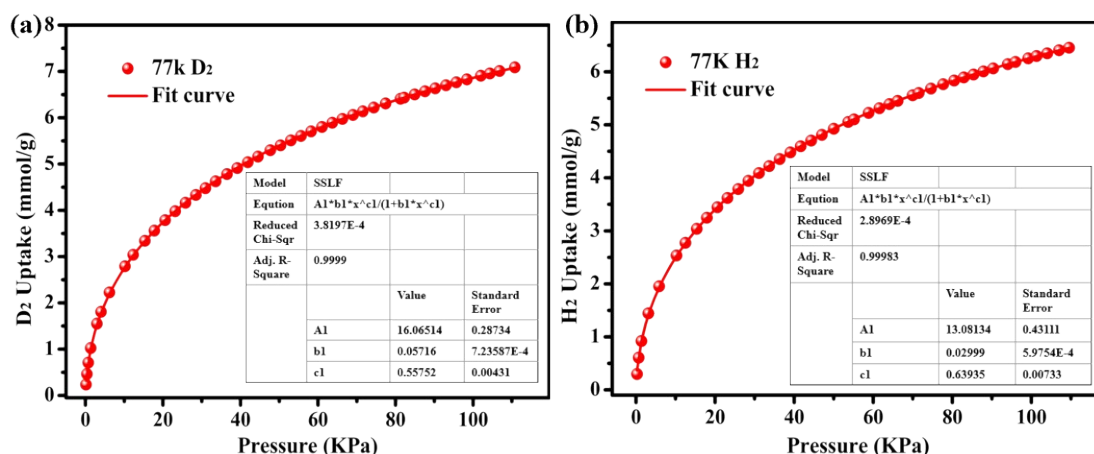

258  
 259 **Figure S30.** Single-site Langmuir-Freundlich fitting of (a) H<sub>2</sub> and (b) D<sub>2</sub> adsorption  
 260 isotherm of CPOC-301 at 77 K.

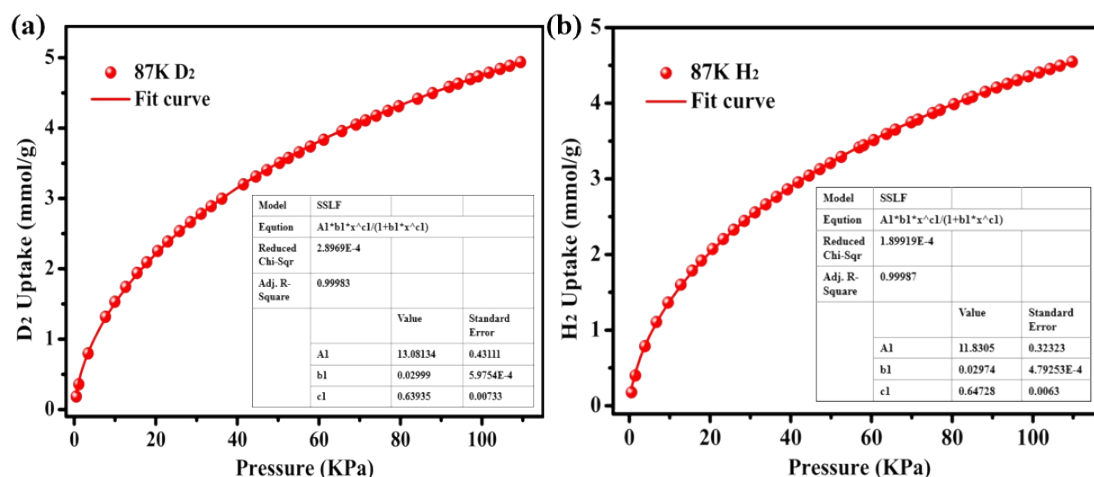

261  
 262 **Figure S31.** Single-site Langmuir-Freundlich fitting of (a) H<sub>2</sub> and (b) D<sub>2</sub> adsorption  
 263 isotherm of CPOC-301 at 87 K.

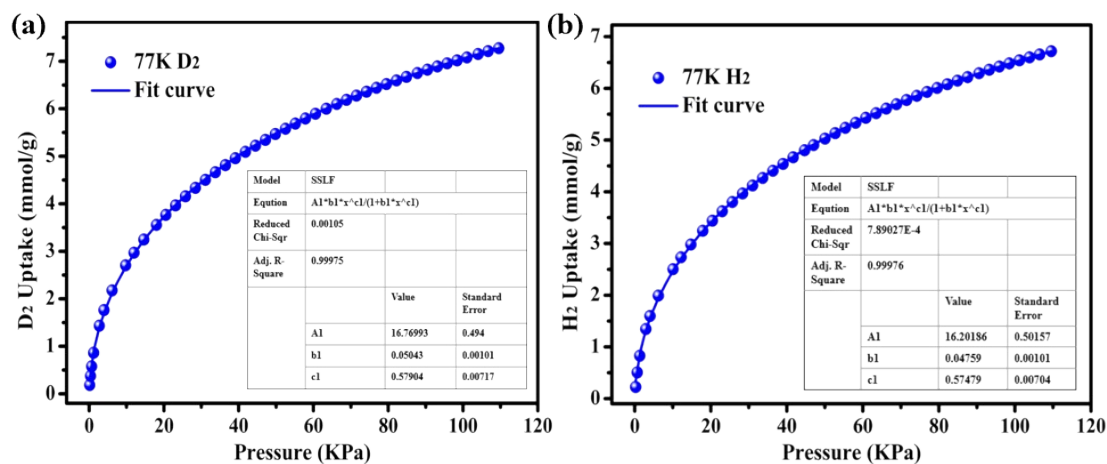

264  
 265 **Figure S32.** Single-site Langmuir-Freundlich fitting of (a) H<sub>2</sub> and (b) D<sub>2</sub> adsorption  
 266 isotherm of SMS-POC-1 at 77 K.

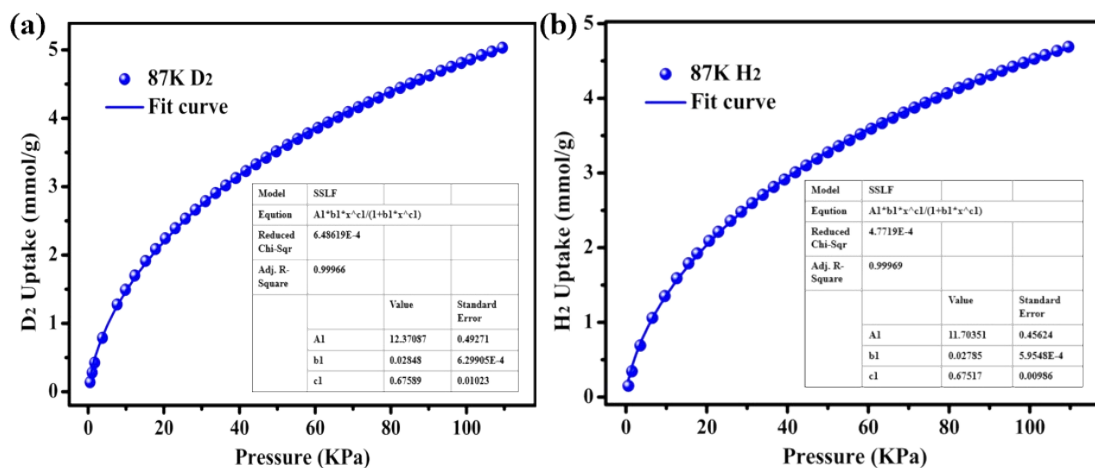

267  
 268 **Figure S33.** Single-site Langmuir-Freundlich fitting of (a) H<sub>2</sub> and (b) D<sub>2</sub> adsorption  
 269 isotherm of SMS-POC-1 at 87 K.

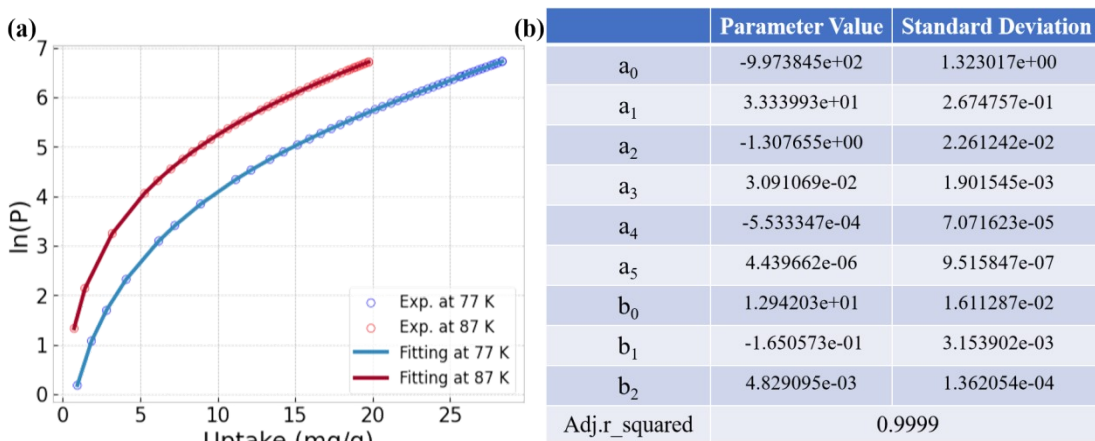

271  
 272 **Figure S34.** (a) Virial equation fitting of D<sub>2</sub> adsorption isotherm of CPOC-301 at 77  
 273 K and 87 K. (b) Relevant fitting parameters for D<sub>2</sub>.

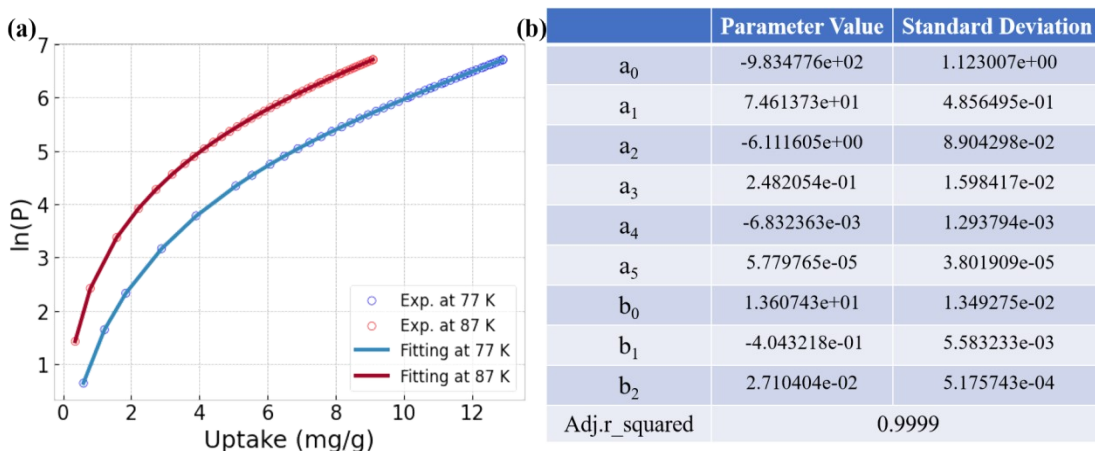

274  
 275 **Figure S35.** (a) Virial equation fitting of H<sub>2</sub> adsorption isotherm of CPOC-301 at 77  
 276 K and 87 K. (b) Relevant fitting parameters for H<sub>2</sub>.



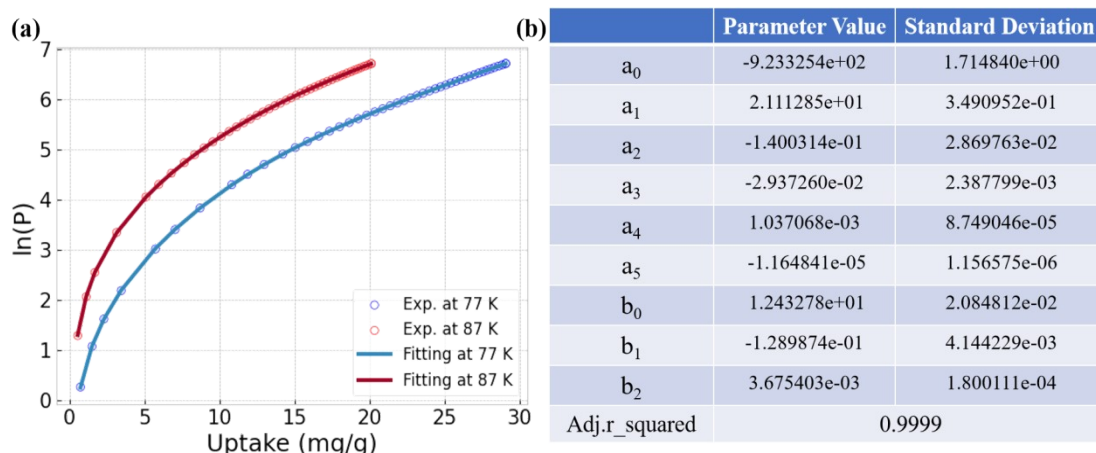

277  
 278 **Figure S36.** (a) Virial equation fitting of D<sub>2</sub> adsorption isotherm of SMS-POC-1 at  
 279 77 K and 87 K. (b) Relevant fitting parameters for D<sub>2</sub>.

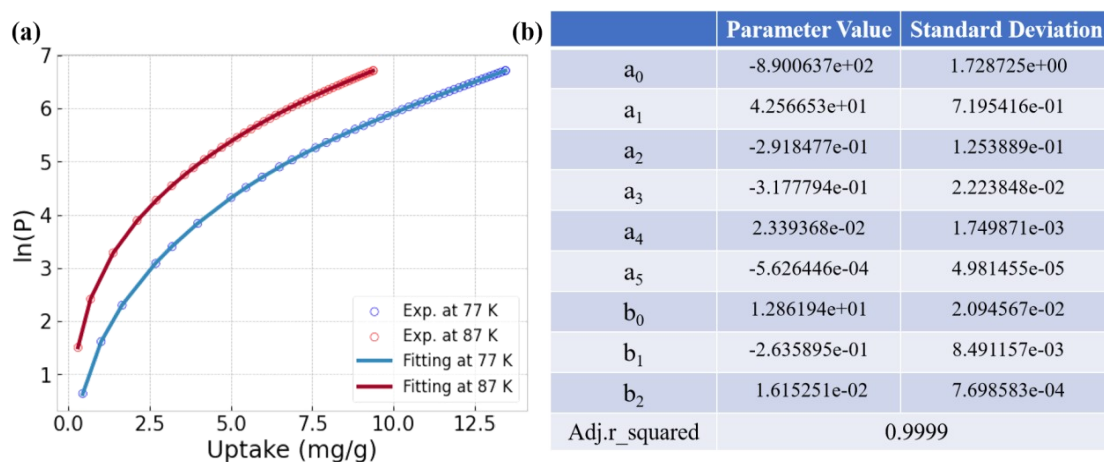

280  
 281 **Figure S37.** (a) Virial equation fitting of H<sub>2</sub> adsorption isotherm of SMS-POC-1 at  
 282 77 K and 87 K. (b) Relevant fitting parameters for H<sub>2</sub>.

283

284

## 285 Section S5. References

- 286 S1. M. Grajda, M. Wierzbicki, P. Cmoch and A. Szumna, *J. Org. Chem.*, 2013, **78**,  
287 11597-11601.
- 288 S2. G. M. Sheldrick, *Acta Crystallogr. C.*, 2015, **71**, 3-8.
- 289 S3. K. E. Jelfs, X. Wu, M. Schmidtman, J. T. A. Jones, J. E. Warren, D. J. Adams  
290 and A. I. Cooper, *Angew. Chem. Int. Ed.*, 2011, **50**, 10653-10656.
- 291 S4. B. Teng, M. A. Little, T. Hasell, S. Y. Chong, K. E. Jelfs, R. Clowes, M. E.  
292 Briggs and A. I. Cooper, *Cryst. Growth Des.*, 2019, **19**, 3647-3651.
- 293 S5. P. Wagner, F. Rominger, W.-S. Zhang, J. H. Gross, S. M. Elbert, R. R. Schroeder  
294 and M. Mastalerz, *Angew. Chem. Int. Ed.*, 2021, **60**, 8896-8904.
- 295 S6. D. Beaudoin, F. Rominger and M. Mastalerz, *Angew. Chem. Int. Ed.*, 2017, **56**,  
296 1244-1248.
- 297 S7. S. Hong, M. R. Rohman, J. Jia, Y. Kim, D. Moon, Y. Kim, Y. H. Ko, E. Lee and  
298 K. Kim, *Angew. Chem. Int. Ed.*, 2015, **54**, 13241-13244.
- 299 S8. Y. A. Si, X. He, J. Jiang, Z. M. Duan, W. J. Wang and D. Q. Yuan, *Nano Res.*,  
300 2021, **14**, 518-525.
- 301 S9. Y. N. Si, W. J. Wang, E. M. El-Sayed and D. Q. Yuan, *Sci. China Chem.*, 2020,  
302 **63**, 881-889.
- 303 S10. X. F. Li, Z. F. Ju, K. Z. Su, W. J. Wang and D. Q. Yuan, *Mater. Chem. Front.*,  
304 2025, **9**, 2508-2513.
- 305 S11. M. Yin, R. Krishna, W. Wang, D. Yuan, Y. Fan, X. Feng, L. Wang and F. Luo,  
306 *CCS Chem.*, 2022, **4**, 1016-1027.
- 307 S12. F.-J. Zhao, Y.-X. Tan, W. Wang, Z. Ju and D. Yuan, *Inorg. Chem.*, 2018, **57**,  
308 13312-13317.
- 309 S13. Y. P. Huang, Z. F. Ju, K. Z. Su, W. J. Wang and D. Q. Yuan, *Inorg. Chem.*, 2025,  
310 **64**, 1203-1207.
- 311 S14. L. Yuan, X. T. Huang, J. Y. Zhu, K. Z. Su, W. J. Wang and D. Q. Yuan, *Inorg.*  
312 *Chem.*, 2025, **64**, 10238-10242.
- 313 S15. Y. Guo, K. Su, W. Wang and D. Yuan, *Inorg. Chem.*, 2025, **64**, 18599-18603.
- 314 S16. W. Zhou, Y. Li, L. Xiong, W. Wang, R. Guan, Z. Chen, D. Yuan, E.-Q. Gao and  
315 D. Zhang, *J. Am. Chem. Soc.*, 2025, **147**, 35664-35674.
- 316 S17. Z. Xie, Z. Zhuo, Z. A. Nan, Q. Li, W. Wu, Y. Zhou, Z. X. Lu, J. Liu, L. Liu, W.  
317 Wang, D. Yuan and Y. G. Huang, *Adv. Sci.*, 2025, DOI:  
318 10.1002/advs.202519498.

319
